# Supplementary material for: Epstein-Barr virus reactivation in sepsis due to community-acquired pneumonia is associated with increased morbidity and an immunosuppressed host transcriptomic endotype
Source: PubMed Central journal article supplement (PMC7299986; doi:10.1038/s41598-020-66713-3), 2020-06-17

**Supplementary Material: Epstein-Barr virus reactivation in sepsis due to community-acquired pneumonia is associated with increased morbidity and an immunosuppressed host transcriptomic endotype**

Cyndi Goh<sup>1</sup>, Katie L Burnham<sup>2</sup>, M Azim Ansari<sup>1,3</sup>, Mariateresa de Cesare<sup>1,4</sup>, Tanya Golubchik<sup>1,4</sup>, Paula Hutton<sup>5</sup>, Lauren E Overend<sup>1</sup>, Emma E Davenport<sup>2</sup>, Charles J Hinds<sup>6</sup>, Rory Bowden<sup>1</sup>, Julian C Knight<sup>1\*</sup>

<sup>1</sup>Wellcome Centre for Human Genetics, University of Oxford, Oxford, UK

<sup>2</sup>Wellcome Sanger Institute, Wellcome Genome Campus, Hinxton, UK

<sup>3</sup>Peter Medawar Building for Pathogen Research, University of Oxford, Oxford, UK

<sup>4</sup>Big Data Institute, University of Oxford, Oxford, UK

<sup>5</sup>Adult Intensive Care Unit, Oxford University Hospitals NHS Foundation Trust, Oxford, UK

<sup>6</sup>William Harvey Research Institute, Barts and The London School of Medicine, Queen Mary University, London, UK

**\*Corresponding author**

Prof Julian C Knight

[julian@well.ox.ac.uk](mailto:julian@well.ox.ac.uk)

**Supplementary Table 1: Clinical characteristics and outcome data of ddPCR cohort.** Epstein-Barr Virus-negative and Epstein-Barr Virus-positive individuals with ddPCR data are compared (total n=565). Intensive care unit length of stay analysis only includes patients surviving to intensive care discharge. Sepsis Response Signature endotype data was available on 314 patients. T-test performed except where indicated (^Chi-squared test; \*Mann-Whitney U-test; §Log-rank test). Summary values refer to the mean. The range of values is provided where relevant.

| <b>Characteristic</b>                                                | <b>Epstein-Barr<br/>Virus-negative<br/>(n=328)</b> | <b>Epstein-Barr<br/>Virus-positive<br/>(n=237)</b> | <b>p-value</b>         |
|----------------------------------------------------------------------|----------------------------------------------------|----------------------------------------------------|------------------------|
| Age (years)                                                          | 60.5 (17-92)                                       | 62.3 (19-91)                                       | 0.18                   |
| Male sex <sup>^</sup>                                                | 200 (61%)                                          | 120 (51%)                                          | 0.018                  |
| Sepsis Response<br>Signature 1 <sup>^</sup>                          | 71 (40%)                                           | 62 (45%)                                           | 0.60                   |
| Charlson Comorbidity<br>Index <sup>*</sup>                           | 2.6 (0-10)                                         | 2.8 (0-9)                                          | 0.41                   |
| ICU-acquired infection <sup>^</sup>                                  | 63 (19%)                                           | 57 (24%)                                           | 0.20                   |
| Mortality (28-day) <sup>§</sup>                                      | 56 (17%)                                           | 57 (24%)                                           | 0.05                   |
| Intensive care unit length<br>of stay <sup>§</sup> (days)            | 9.2 (1-101)                                        | 13.2 (1-55)                                        | 0.005                  |
| Sequential Organ Failure<br>Assessment score (day<br>1) <sup>*</sup> | 5.9 (0-17)                                         | 6.9 (1-19)                                         | 0.00048                |
| Sequential Organ Failure<br>Assessment score                         | 6.7 (0-19)                                         | 8.0 (1-21)                                         | 2.1 x 10 <sup>-5</sup> |

|                                           |  |  |  |
|-------------------------------------------|--|--|--|
| (maximum over first 7 days of admission)* |  |  |  |
|-------------------------------------------|--|--|--|

**Supplementary Table 2: Clinical characteristics and outcome data of metagenomics cohort.** Epstein-Barr Virus-negative and Epstein-Barr Virus-positive individuals with metagenomics data are compared (total n=573). Intensive care unit length of stay analysis only includes patients surviving to intensive care discharge. Sepsis Response Signature endotype data was available on 311 patients. T-test performed except where indicated (^Chi-squared test; \*Mann-Whitney U-test; §Log-rank test). Summary values refer to the mean. The range of values is provided where relevant.

| <b>Characteristic</b>                                                | <b>Epstein-Barr<br/>Virus-negative<br/>(n=383)</b> | <b>Epstein-Barr<br/>Virus-positive<br/>(n=190)</b> | <b>p-value</b>         |
|----------------------------------------------------------------------|----------------------------------------------------|----------------------------------------------------|------------------------|
| Age (years)                                                          | 59.9 (17-91)                                       | 63.8 (19-91)                                       | 0.0043                 |
| Male sex <sup>^</sup>                                                | 224 (58%)                                          | 100 (53%)                                          | 0.21                   |
| Sepsis Response<br>Signature 1 <sup>^</sup>                          | 72 (36%)                                           | 51 (46%)                                           | 0.11                   |
| Charlson Comorbidity<br>Index <sup>*</sup>                           | 2.5 (0-10)                                         | 3.0 (0-9)                                          | 0.0075                 |
| ICU-acquired infection <sup>^</sup>                                  | 61 (16%)                                           | 41 (22%)                                           | 0.12                   |
| Mortality (28-day) <sup>§</sup>                                      | 64 (17%)                                           | 42 (22%)                                           | 0.10                   |
| Intensive care unit length<br>of stay <sup>§</sup> (days)            | 8.8 (1-75)                                         | 12.3 (1-51)                                        | 0.0040                 |
| Sequential Organ Failure<br>Assessment score (day<br>1) <sup>*</sup> | 5.8 (0-17)                                         | 7.1 (1-19)                                         | 1.9 x 10 <sup>-5</sup> |

|                                                                                     |            |            |                        |
|-------------------------------------------------------------------------------------|------------|------------|------------------------|
| Sequential Organ Failure Assessment score (maximum over first 7 days of admission)* | 6.6 (0-19) | 8.0 (1-21) | 1.2 x 10 <sup>-5</sup> |
|-------------------------------------------------------------------------------------|------------|------------|------------------------|

**Supplementary Table 3: Epstein-Barr Virus status by day of sampling after intensive care unit admission.** Plasma samples (n=1042) were collected on days 1 and/or 3 and/or 5 of ICU admission and EBV reactivation assessed by targeted metagenomics and/or ddPCR.

| Day of sampling | EBV-negative | EBV-positive | Total |
|-----------------|--------------|--------------|-------|
| 1               | 245 (75%)    | 82 (25%)     | 327   |
| 3               | 247 (70%)    | 106 (30%)    | 353   |
| 5               | 209 (58%)    | 153 (42%)    | 362   |

**Supplementary Table 4: Microbiology of patient cohort.** The microbiological causes of community-acquired pneumonia are compared between EBV-negative and EBV-positive individuals using a Chi-squared analysis. Patients with unknown microbiology are excluded from the statistical analysis.

| Microbiology          | EBV-negative | EBV-positive | p-value |
|-----------------------|--------------|--------------|---------|
| Bacterial             | 115 (25%)    | 101(37%)     | 0.987   |
| Viral                 | 32 (7%)      | 27 (10%)     | 0.944   |
| Mixed bacterial/viral | 4 (1%)       | 5 (2%)       | 0.856   |
| Fungal                | 0 (0%)       | 1 (0%)       | 0.952   |
| Unknown               | 309 (67%)    | 137 (51%)    | NA      |

**Supplementary Table 5: Clinical characteristics and outcome data of gene expression cohort.**

Epstein-Barr Virus-negative and Epstein-Barr Virus-positive individuals with gene expression data are compared (total n=390). Intensive care unit length of stay analysis only includes patients surviving to intensive care discharge. T-test performed except where indicated (^Chi-squared test; \*Mann-Whitney U-test; <sup>§</sup>Log-rank test). Summary values refer to the mean. The range of values is provided where relevant.

| <b>Characteristic</b>                                     | <b>Epstein-Barr<br/>Virus-negative<br/>(n=239)</b> | <b>Epstein-Barr<br/>Virus-positive<br/>(n=152)</b> | <b>p-value</b> |
|-----------------------------------------------------------|----------------------------------------------------|----------------------------------------------------|----------------|
| Age (years)                                               | 63.5 (19-91)                                       | 63.5 (17-91)                                       | 1.00           |
| Male sex <sup>^</sup>                                     | 149 (62%)                                          | 88 (58%)                                           | 0.44           |
| Sepsis Response<br>Signature 1 <sup>^</sup>               | 84 (35%)                                           | 67 (44%)                                           | 0.097          |
| Charlson Comorbidity<br>Index*                            | 2.9 (0-10)                                         | 2.8 (0-9)                                          | 0.39           |
| ICU-acquired infection <sup>^</sup>                       | 51 (21%)                                           | 382 (25%)                                          | 0.48           |
| Mortality (28-day) <sup>§</sup>                           | 60 (25%)                                           | 48 (32%)                                           | 0.20           |
| Intensive care unit length<br>of stay <sup>§</sup> (days) | 10.7 (1-101)                                       | 13.4 (1-51)                                        | 0.070          |
| Sequential Organ Failure<br>Assessment score (day<br>1)*  | 6.2 (0-15)                                         | 7.0 (1-19)                                         | 0.019          |
| Sequential Organ Failure<br>Assessment score              | 7.1 (1-19)                                         | 8.1 (1-21)                                         | 0.0066         |

|                                              |  |  |  |
|----------------------------------------------|--|--|--|
| (maximum over first 7<br>days of admission)* |  |  |  |
|----------------------------------------------|--|--|--|

**Supplementary Figure 1: Volcano plot showing differentially expressed probes between Epstein-Barr Virus-negative and Epstein-Barr Virus-positive individuals with Sepsis Response Signature sepsis endotype included in the linear model.** Labelled probes in red are differentially expressed at a fold change of 1.5 and false discovery rate of 0.05; positive fold change corresponds to upregulation in Epstein-Barr Virus-positive individuals. Figure created using ggplot2 v3.2.0 [34].

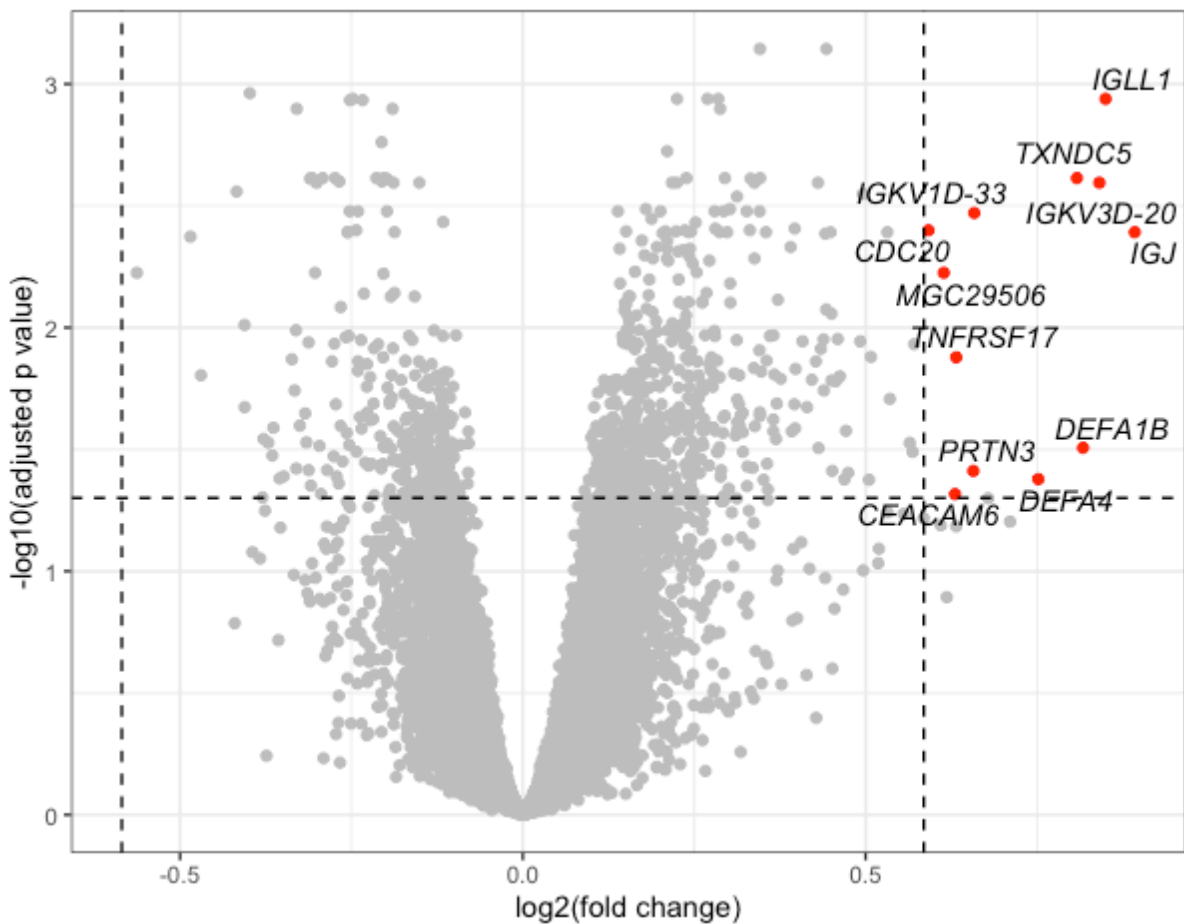

Supplement: 41598_2020_66713_MOESM1_ESM.pdf [file 41598_2020_66713_MOESM1_ESM.pdf]
